# Supplementary material
Source: PubMed Central journal article supplement (PMC4706798)

Supplemental Table 1. Conversion of Fluorescence Signal to Number of Intracellular Doxorubicin Molecules

| <b>Cell Line</b> | <b>Tras-647<br/>Cell Signal</b><br>(Treated MFU –<br>untreated MFU) | <b>HER2 Expression<br/>Level</b><br>(# of HER2<br>receptors per cell) | <b>Tras-Dox<br/>Cell Signal</b><br>(Treated MFU –<br>untreated MFU) | <b>Number of<br/>Intracellular<br/>Doxorubicin Molecules<br/>per MFU</b> |
|------------------|---------------------------------------------------------------------|-----------------------------------------------------------------------|---------------------------------------------------------------------|--------------------------------------------------------------------------|
| BT-474           | $1.2 \times 10^6$                                                   | $2.34 \times 10^6$                                                    | 70.0                                                                | $6.7 \times 10^4$                                                        |
| N87              | $1.4 \times 10^6$                                                   | $2.67 \times 10^6$                                                    | 40.2                                                                | $13.3 \times 10^4$                                                       |
| SK-BR-3          | $1.1 \times 10^6$                                                   | $2.23 \times 10^6$                                                    | 45.0                                                                | $9.9 \times 10^4$                                                        |
| <b>Average</b>   |                                                                     |                                                                       |                                                                     | $10.0 \times 10^4 \pm 1.9 \times 10^4$                                   |

BT474

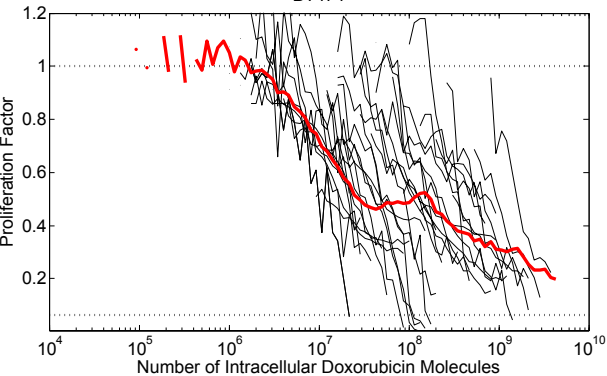

HCT-15

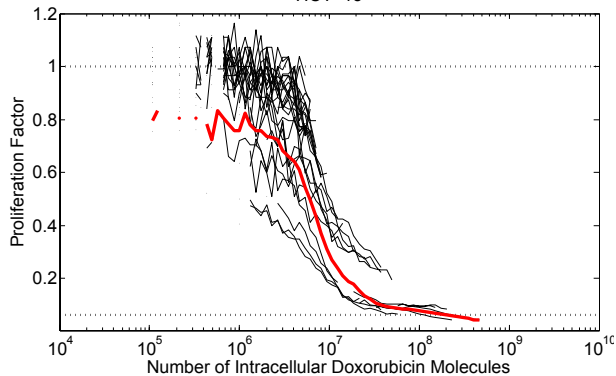

HT-29

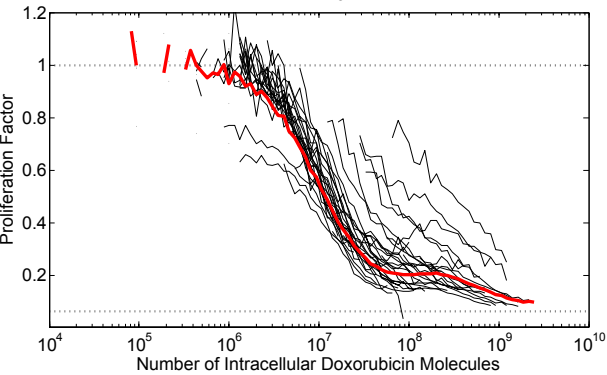

IGrov-1

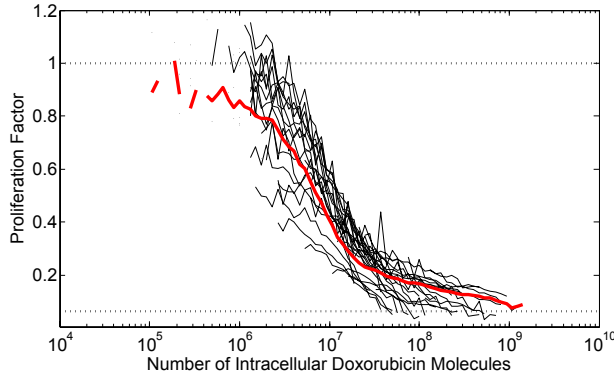

MDA-MB-231

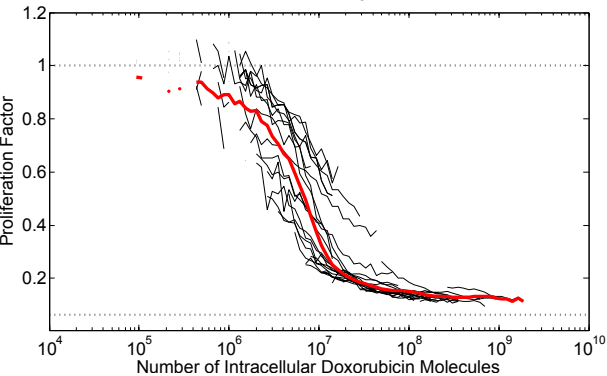

T-47D

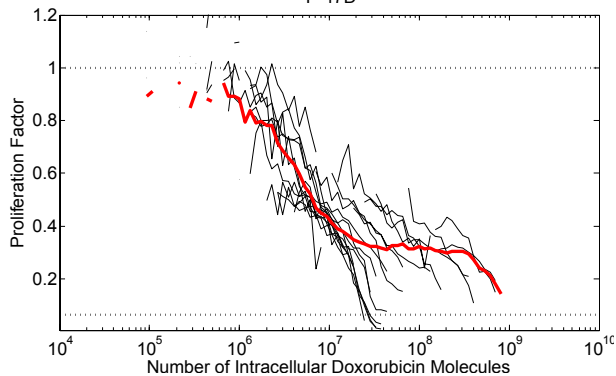

Supplement: NIHMS717070-supplement-Supp_TableS1___FigureS1.pdf [file NIHMS717070-supplement-Supp_TableS1___FigureS1.pdf]
